# Supplementary material for: Transcriptomic and Proteomic Analysis Reveals the Potential Role of RBMS1 in Adipogenesis and Adipocyte Metabolism
Source: MDPI journal article supplement (doi:10.3390/ijms241411300), 2023-07-11
Supplement: s1 [file s1]

| RBP name     | Average CPM |
|--------------|-------------|
| Hdlbp        | 11.03       |
| Pabpc1       | 11.03       |
| Srrm2        | 10.87       |
| Zfp36l1      | 10.66       |
| Hnrnpa2b1    | 10.42       |
| Hnrnpa3      | 10.24       |
| Ncl          | 10.14       |
| Ankrd17      | 10.02       |
| Fus          | 9.98        |
| Eif4b        | 9.91        |
| Hnrnpf       | 9.87        |
| Csde1        | 9.81        |
| Zfp36l2      | 9.76        |
| Zfr          | 9.71        |
| Pcbp2        | 9.69        |
| Hnrnpk       | 9.68        |
| Ybx1         | 9.65        |
| Srsf5        | 9.60        |
| Nono         | 9.42        |
| Hnrnph1      | 9.27        |
| Hnrnpa1      | 9.28        |
| Bicc1        | 9.25        |
| Igf2bp2      | 9.19        |
| Rbfox2       | 9.20        |
| Tnrc6b       | 9.17        |
| Rbm39        | 9.13        |
| Syncrip      | 9.12        |
| Zc3hav1      | 9.09        |
| Sfpq         | 9.06        |
| Supt6        | 8.98        |
| Mbnl1        | 8.94        |
| <b>Rbms1</b> | <b>8.93</b> |
| Rbm25        | 8.89        |
| Larp1        | 8.87        |
| Ewsr1        | 8.86        |
| Larp4        | 8.79        |
| Mbnl2        | 8.72        |

|         |      |
|---------|------|
| Qk      | 8.69 |
| Hnrnpd  | 8.66 |
| Ssb     | 8.61 |
| Hnrnpdl | 8.61 |
| Pcbp1   | 8.60 |
| Matr3   | 8.60 |
| Parp14  | 8.51 |
| Hnrnpab | 8.56 |
| Zfp638  | 8.56 |
| Srrm1   | 8.55 |
| Zc3h7b  | 8.55 |
| Pum2    | 8.54 |
| Hnrnpm  | 8.50 |
| Sf1     | 8.52 |
| Eif4h   | 8.51 |
| Rbm3    | 8.47 |
| Fmr1    | 8.42 |
| Ptbp1   | 8.45 |
| Hnrnpl  | 8.44 |
| Rc3h2   | 8.41 |
| Rbms2   | 8.37 |
| Khsrp   | 8.36 |
| G3bp2   | 8.35 |
| Rbms3   | 8.32 |
| Srsf11  | 8.31 |
| Srsf6   | 8.27 |
| Tra2b   | 8.23 |
| Acin1   | 8.21 |
| Srsf1   | 8.14 |
| Srsf3   | 8.10 |
| Sfswap  | 8.08 |
| Eif3b   | 8.09 |
| Taf15   | 8.06 |
| Rbm5    | 8.08 |
| Zc3h14  | 8.07 |
| Spen    | 8.04 |
| Ankhd1  | 8.03 |
| Ptbp3   | 8.02 |
| Hnrnpc  | 8.00 |
| Srrt    | 8.00 |
| Tia1    | 8.00 |

|          |      |
|----------|------|
| Marf1    | 7.99 |
| Khdrbs1  | 7.94 |
| Zc3h15   | 7.92 |
| Ccar1    | 7.91 |
| Raly     | 7.88 |
| Celf1    | 7.88 |
| Ythdc1   | 7.86 |
| Tardbp   | 7.86 |
| Hnrnpr   | 7.78 |
| Scaf8    | 7.85 |
| Helz     | 7.76 |
| Cstf2t   | 7.74 |
| Rc3h1    | 7.73 |
| Srsf10   | 7.72 |
| Pum1     | 7.71 |
| Tnrc6a   | 7.70 |
| Snrnp70  | 7.71 |
| Safb     | 7.67 |
| Fubp3    | 7.64 |
| Upf1     | 7.65 |
| Hnrnpa0  | 7.61 |
| U2surp   | 7.62 |
| Zc3h13   | 7.60 |
| Ybx3     | 7.61 |
| Ythdf3   | 7.60 |
| Igf2bp3  | 7.61 |
| Ppargc1a | 7.56 |
| Cnot4    | 7.48 |
| Ireb2    | 7.57 |
| Tnrc6c   | 7.54 |
| Fubp1    | 7.51 |
| Fxr1     | 7.50 |
| Rbm17    | 7.43 |
| Hnrnph2  | 7.47 |
| Rbm33    | 7.43 |
| Pum3     | 7.46 |
| Rbpms    | 7.46 |
| Rbm28    | 7.45 |
| Setd1a   | 7.40 |
| Ppp1r10  | 7.40 |
| Rbm6     | 7.39 |

|         |      |
|---------|------|
| Cherp   | 7.36 |
| Larp4b  | 7.39 |
| Celf2   | 7.35 |
| Dazap1  | 7.34 |
| Tra2a   | 7.30 |
| Puf60   | 7.33 |
| Rbm26   | 7.32 |
| G3bp1   | 7.32 |
| Zc3h18  | 7.30 |
| Cpsf6   | 7.29 |
| U2af2   | 7.30 |
| Ro60    | 7.28 |
| Poldip3 | 7.25 |
| Parp12  | 7.26 |
| Cpsf7   | 7.26 |
| Safb2   | 7.19 |
| Rbmxl1  | 7.22 |
| Pabpc4  | 7.19 |
| Snrpd3  | 7.21 |
| Pabpn1  | 7.19 |
| Tiparp  | 7.18 |
| Srsf2   | 7.18 |
| Cpeb4   | 7.13 |
| Grsf1   | 7.14 |
| Aco1    | 7.13 |
| Zfp36   | 7.11 |
| Ttc14   | 7.02 |
| Scaf4   | 7.06 |
| Zc3h4   | 7.05 |
| Pdcd11  | 7.02 |
| Rbm27   | 6.98 |
| Sart3   | 6.94 |
| Zc3h7a  | 6.95 |
| Srek1   | 6.95 |
| Eif2s1  | 6.94 |
| Ythdf1  | 6.89 |
| Mex3a   | 6.87 |
| Mex3c   | 6.88 |
| Myef2   | 6.88 |
| Rbm10   | 6.86 |
| Samd4   | 6.84 |

|         |      |
|---------|------|
| Srsf9   | 6.82 |
| Raver1  | 6.84 |
| Tial1   | 6.80 |
| Ptbp2   | 6.79 |
| Rbm15   | 6.77 |
| Elavl1  | 6.74 |
| Htatsf1 | 6.59 |
| Dhx57   | 6.73 |
| Synj1   | 6.70 |
| Pprc1   | 6.65 |
| Akap1   | 6.62 |
| Srsf4   | 6.62 |
| HnrnpII | 6.58 |
| Slbp    | 6.63 |
| Zc3h12a | 6.59 |
| Zrsr2   | 6.59 |
| Enox1   | 6.57 |
| Dhx8    | 6.55 |
| Ythdf2  | 6.52 |
| Pnpt1   | 6.50 |
| Rbm18   | 6.47 |
| Prpf3   | 6.48 |
| Sf3a1   | 6.32 |
| Ppil4   | 6.45 |
| Cpne1   | 6.42 |
| Rbm8a   | 6.41 |
| Snrpc   | 6.38 |
| Sugp1   | 6.38 |
| Pcbp4   | 6.36 |
| Snrpd1  | 6.17 |
| Larp7   | 6.31 |
| U2af1   | 6.34 |
| Sltn    | 6.29 |
| Snrpb2  | 6.27 |
| Rbm22   | 6.31 |
| Upf3b   | 6.29 |
| Fxr2    | 6.26 |
| Tmem63a | 6.27 |
| Cstf2   | 6.30 |
| Msi2    | 6.25 |
| Zcrb1   | 6.26 |

|                              |      |
|------------------------------|------|
| Tep1                         | 6.26 |
| Eif3g                        | 6.26 |
| Snrpa                        | 6.17 |
| Alyref                       | 6.17 |
| Mcm3ap                       | 6.18 |
| Rbm7                         | 6.13 |
| Uhmk1                        | 6.11 |
| Rnps1                        | 5.91 |
| Parn                         | 6.11 |
| Pspc1                        | 6.08 |
| Nifk                         | 6.08 |
| Nol8                         | 6.05 |
| Unk                          | 6.02 |
| Thumpd3                      | 5.85 |
| Snrpf                        | 5.99 |
| Mex3d                        | 5.96 |
| Krr1                         | 6.03 |
| Igf2bp1                      | 6.01 |
| Rrp7a                        | 5.95 |
| Sf3b6                        | 5.95 |
| Sf3b4                        | 5.90 |
| Trmt1l<br>ENSMUSG00000053286 | 5.86 |
| Dus3l                        | 5.83 |
| Srsf7                        | 5.88 |
| Eif2d                        | 5.85 |
| Snrpb                        | 5.85 |
| Slirp                        | 5.83 |
| Prr3                         | 5.57 |
| Zc3h6                        | 5.76 |
| Lsm2                         | 5.75 |
| Srbd1                        | 5.71 |
| Rbm14                        | 5.28 |
| Zgpat                        | 5.66 |
| Rbm45                        | 5.55 |
| Mkrn1                        | 5.65 |
| Rbm4b                        | 5.55 |
| Sugp2                        | 5.46 |
| Dkc1                         | 5.62 |
| Gtf3a                        | 5.60 |
| Zc3hav1l                     | 5.61 |
| Lsm8                         | 5.52 |

|          |      |
|----------|------|
| Thumpd1  | 5.55 |
| Alkbh8   | 5.55 |
| RbmX     | 5.51 |
| Gm7964   | 5.25 |
| Trmt1    | 5.46 |
| Lsm3     | 5.51 |
| Nelfe    | 5.46 |
| Hnrnp3   | 5.42 |
| Zrsr1    | 5.33 |
| Rbm12b2  | 5.33 |
| Zcchc17  | 5.33 |
| Rbm42    | 5.37 |
| Tut1     | 5.31 |
| Rbm19    | 5.23 |
| Trmt2a   | 5.30 |
| Aptx     | 5.06 |
| Samd14   | 5.24 |
| Toe1     | 4.99 |
| Lsm4     | 5.08 |
| Clasrp   | 5.17 |
| Carhsp1  | 5.16 |
| Nip7     | 5.14 |
| Lsm1     | 5.11 |
| Zc3h3    | 5.08 |
| Lsm6     | 5.05 |
| Rbm41    | 5.03 |
| Tdrkh    | 5.01 |
| Zc3h12c  | 4.96 |
| Cpsf4    | 4.89 |
| Mkrn2    | 4.96 |
| Cirbp    | 4.96 |
| Synj2    | 4.92 |
| Naa38    | 4.68 |
| Rbm34    | 4.88 |
| Mthfsd   | 4.84 |
| Snrpg    | 4.80 |
| Trnau1ap | 4.79 |
| Rbm43    | 4.73 |
| Ascc1    | 4.66 |
| Cpeb2    | 4.69 |
| Cpeb3    | 4.51 |

|          |      |
|----------|------|
| Dgkq     | 4.63 |
| Zc3h12b  | 4.55 |
| Lemd3    | 4.47 |
| Ppie     | 4.54 |
| Nufip1   | 4.50 |
| Polr2g   | 4.50 |
| Pno1     | 4.40 |
| Snrnp35  | 4.32 |
| Mcts1    | 4.06 |
| Pcbp3    | 4.34 |
| Nupl2    | 3.66 |
| Kin      | 4.06 |
| Snrpd2   | 4.14 |
| Lsm10    | 4.14 |
| RbmX2    | 4.16 |
| Larp6    | 4.13 |
| Mcts2    | 3.83 |
| Ythdc2   | 3.95 |
| Mex3b    | 3.73 |
| U2af1l4  | 3.84 |
| Rnpc3    | 3.72 |
| Rbm47    | 3.79 |
| Celf5    | 3.79 |
| Unkl     | 3.61 |
| Ppargc1b | 3.70 |
| Nop9     | 3.70 |
| Leng9    | 3.62 |
| Mbnl3    | 3.45 |
| Lsm7     | 2.60 |
| Rexo5    | 3.30 |
| Enox2    | 3.30 |
| Thumpd2  | 3.30 |
| Akap17b  | 3.19 |
| Zc3h8    | 2.95 |
| Dnajc17  | 3.06 |
| Snrpert  | 2.67 |
| Zc3h10   | 2.72 |
| Rbm38    | 2.72 |
| Alyref2  | 2.72 |
| Gm2531   | 2.24 |
| Nsun6    | 2.18 |



|               |      |
|---------------|------|
| Csdc2         | 2.18 |
| Lsm11         | 2.57 |
| Gm38393       | 2.44 |
| Celf4         | 2.05 |
| Rbpms2        | 2.37 |
| Rbm20         | 2.37 |
| Gm9833        | 2.01 |
| Msi1          | 2.01 |
| Rnf113a1      | 1.90 |
| Rdm1          | 2.10 |
| Cpeb1         | 1.70 |
| Pabpc1l       | 1.70 |
| Gm7846        | 1.67 |
| Zmat5         | 1.67 |
| Rbm12b1       | 1.43 |
| Gm7353        | 1.00 |
| Rcan2         | 1.00 |
| Mkrn3         | 1.00 |
| Ybx2          | 1.00 |
| Elavl3        | 1.00 |
| Gm10110       | 1.00 |
| Zfp239        | 1.00 |
| Gm11847       | 1.00 |
| E130201H02Rik | 1.00 |
| Gm8991        | 1.00 |
| Zc3h12d       | 1.00 |
| Nova2         | 1.00 |
| Rbfox3        | 1.00 |
| Dnd1          | 1.00 |

**Supplemental Table S1- The expression of RNA binding proteins (RBPs) in 3T3-L1 cells before differentiation**

|    | Gene name | log2FoldChange | padj     | baseMean |
|----|-----------|----------------|----------|----------|
| 1  | Chrdl1    | -2.09402       | 4.76E-24 | 375.5417 |
| 2  | Acta1     | -3.87819       | 5.76E-14 | 49.61433 |
| 3  | Rasd1     | -3.41071       | 5.76E-14 | 97.30497 |
| 4  | Egfr      | -1.98342       | 8.78E-13 | 290.9481 |
| 5  | Col15a1   | -4.25313       | 5.04E-11 | 941.4901 |
| 6  | Tsnax     | -2.01538       | 5.70E-11 | 132.1724 |
| 7  | Nid2      | -1.66705       | 3.56E-10 | 340.2233 |
| 8  | Smarca2   | -1.51604       | 6.80E-10 | 510.8047 |
| 9  | Ptprm     | -1.71434       | 2.12E-09 | 209.2896 |
| 10 | Cdo1      | -1.45215       | 6.16E-09 | 937.7774 |
| 11 | P3h3      | -2.8276        | 1.56E-08 | 49.57788 |
| 12 | Sfrp2     | -3.09291       | 2.64E-08 | 61.2085  |
| 13 | Cgnl1     | -1.63825       | 2.64E-08 | 366.6287 |
| 14 | Sowahc    | -1.18834       | 3.93E-08 | 386.6229 |
| 15 | Grb10     | -2.7464        | 1.24E-07 | 57.46836 |
| 16 | Col23a1   | -2.18552       | 3.64E-07 | 47.58231 |
| 17 | Ptgfr     | -1.53576       | 3.64E-07 | 281.1325 |
| 18 | Gstk1     | -1.98943       | 5.97E-07 | 366.6287 |
| 19 | Dusp1     | -2.0816        | 6.78E-07 | 418.0667 |
| 20 | Anxa5     | -0.93079       | 7.49E-07 | 766.809  |
| 21 | Adgrl2    | -1.80079       | 7.91E-07 | 129.6421 |
| 22 | Ndrp2     | -3.62018       | 9.39E-07 | 22.24974 |
| 23 | Lum       | -1.76132       | 1.52E-06 | 152.2317 |
| 24 | Thrsp     | -1.64427       | 1.52E-06 | 1647.547 |
| 25 | Mest      | -7.02723       | 3.16E-06 | 16.24745 |

**Supplemental Table S2- Top 25 most significant downregulated genes in 3T3-L1 cells after Rbms1 knockdown**

|    | Gene name | log2FoldChange | padj     | baseMean |
|----|-----------|----------------|----------|----------|
| 1  | Gm773     | 3.074423       | 7.77E-09 | 61.99956 |
| 2  | Pcyox1    | 0.888747       | 6.78E-07 | 1752.371 |
| 3  | Sox11     | 2.662427       | 1.65E-05 | 67.49147 |
| 4  | Gm6741    | 5.583851       | 4.62E-05 | 17.76817 |
| 5  | Gabre     | 1.507848       | 5.14E-05 | 144.6738 |
| 6  | Rgs17     | 1.580638       | 0.000119 | 73.6931  |
| 7  | Rnf128    | 2.136338       | 0.00019  | 59.97889 |
| 8  | Pltp      | 1.321833       | 0.000217 | 442.4367 |
| 9  | Bhlhe41   | 1.333575       | 0.00026  | 112.2864 |
| 10 | Plxna4    | 1.636459       | 0.000348 | 59.74828 |
| 11 | Parvb     | 1.365159       | 0.000451 | 94.36023 |
| 12 | Cyp2e1    | 4.228098       | 0.000737 | 10.99569 |
| 13 | Tmem151a  | 2.270955       | 0.00082  | 26.64605 |
| 14 | Sh3tc1    | 1.283811       | 0.001015 | 71.14589 |
| 15 | Spire1    | 1.066147       | 0.001656 | 98.83157 |
| 16 | Tmeff1    | 0.841214       | 0.002286 | 141.5828 |
| 17 | Stbd1     | 1.440143       | 0.003533 | 75.27255 |
| 18 | Uck2      | 0.67885        | 0.004421 | 234.8702 |
| 19 | Six4      | 0.894881       | 0.005098 | 171.7154 |
| 20 | Fmr1      | 0.705129       | 0.005247 | 1187.294 |
| 21 | Unc5b     | 0.68615        | 0.0063   | 276.9005 |
| 22 | Xpr1      | 0.604063       | 0.006414 | 474.9455 |
| 23 | Prelp     | 0.656263       | 0.006692 | 1068.981 |
| 24 | Slc5a7    | 2.137867       | 0.007106 | 14.0031  |
| 25 | Bid       | 0.85912        | 0.00811  | 131.879  |

**Supplemental Table S3- Top 25 most significant downregulated genes in 3T3-L1 cells after Rbms1 knockdown**

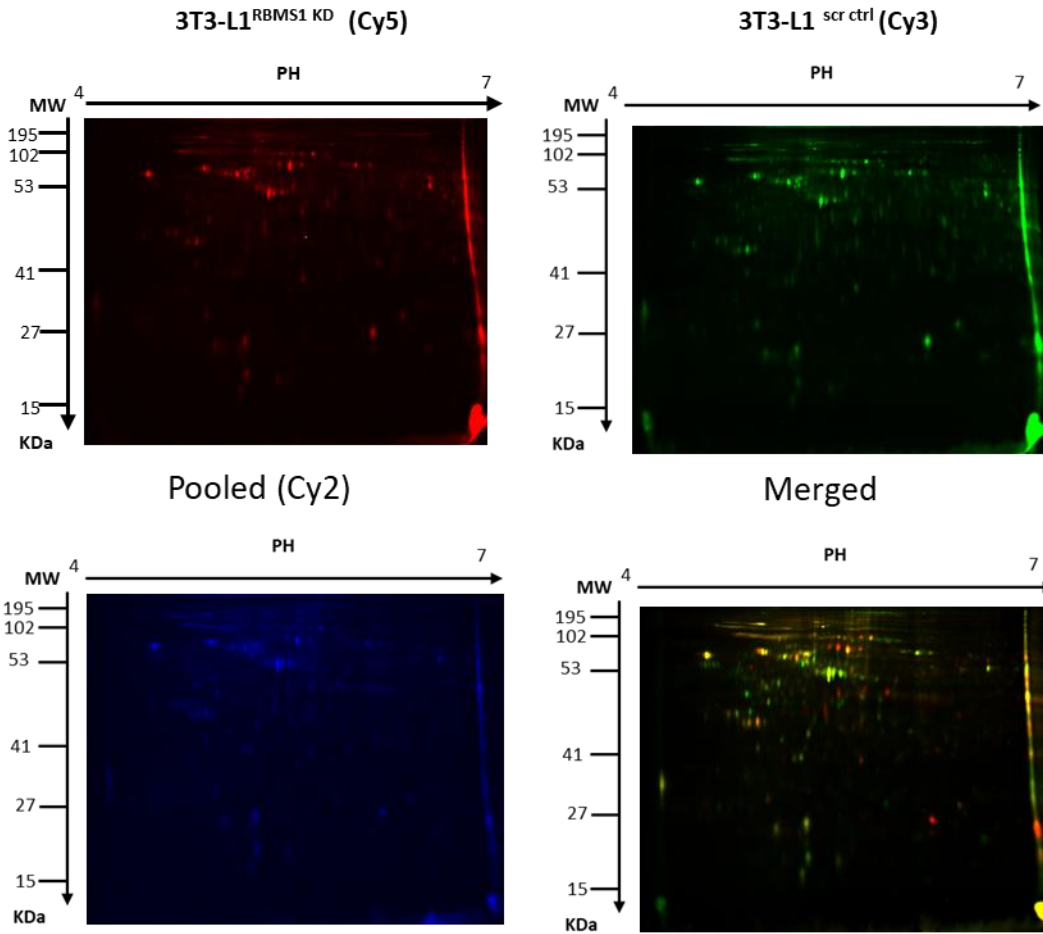

**Supplemental Figure S1 (S1)- A representative image showing the protein separation pattern is shown in the 3T3-L1<sup>RBMS1 KD</sup> and 3T3-L1<sup>scr ctrl</sup> adipocytes.**

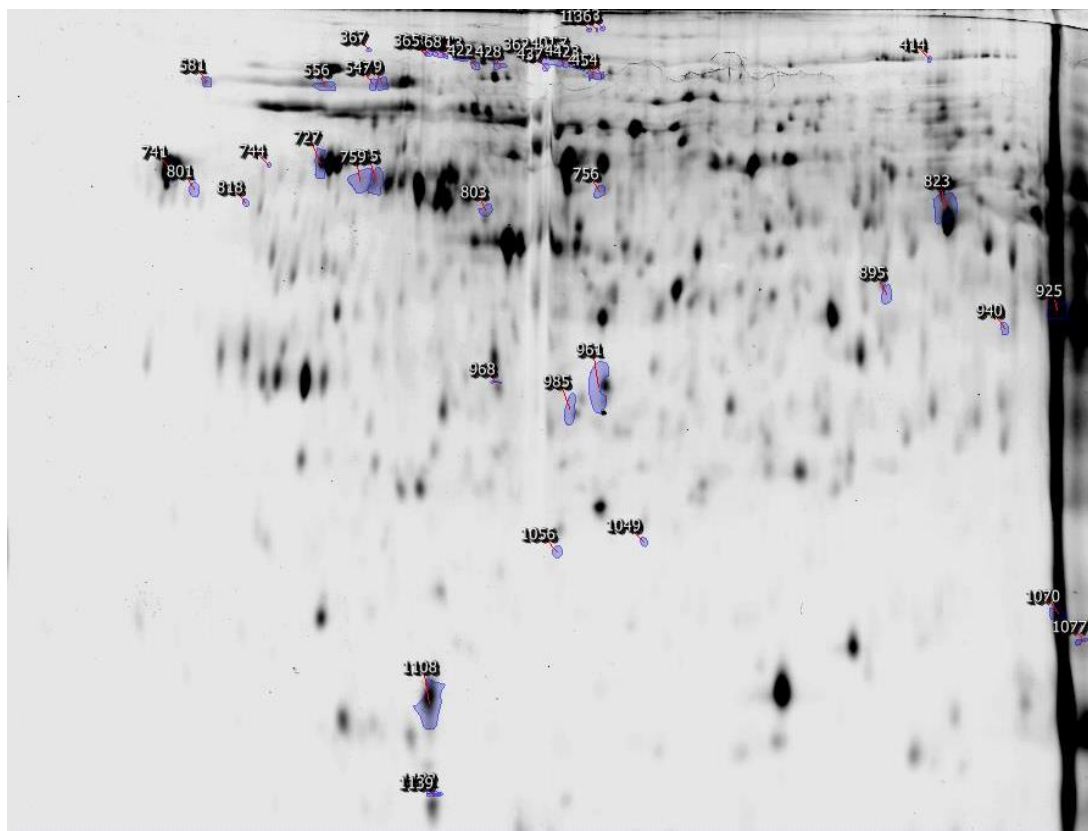

Supplemental Figure S2 (S2)- A representative image protein spots on the gel

| SI no: | Spot No <sup>a</sup> | Accession No <sup>b</sup> | Protein Name                                                 | MASCOT ID   | P value (ANOVA) | Ratio <sup>c</sup> | Pi <sup>d</sup> | MW <sup>e</sup> | Cov% | Score <sup>f</sup> | EXP |
|--------|----------------------|---------------------------|--------------------------------------------------------------|-------------|-----------------|--------------------|-----------------|-----------------|------|--------------------|-----|
| 1      | 1056                 | Q9DCX2                    | ATP synthase subunit d, mitochondrial                        | ATP5H_MOUSE | 0.002           | -5.04062           | 5.52            | 18738           | 61   | 57                 | ↓   |
| 2      | 410                  | P63017                    | Heat shock cognate 71 kDa protein                            | HSP7C_MOUSE | 0.003           | -3.93272           | 5.37            | 70827           | 26   | 67                 | ↓   |
| 3      | 404                  | Q8BZQ7                    | Anaphase-promoting complex subunit 2                         | ANC2_MOUSE  | 0.005           | -4.76049           | 5.21            | 95261           | 9    | 57                 | ↓   |
| 4      | 370                  | P11499                    | Heat shock protein HSP 90-beta                               | HS90B_MOUSE | 0.005           | -4.78179           | 4.97            | 83273           | 39   | 121                | ↓   |
| 5      | 744                  | Q9ET22                    | Dipeptidyl peptidase 2                                       | DPP2_MOUSE  | 0.005           | -5.30529           | 5.17            | 56234           | 26   | 200                | ↓   |
| 6      | 925                  | P08249                    | Malate dehydrogenase, mitochondrial                          | MDHM_MOUSE  | 0.006           | 14.29734           | 8.93            | 35589           | 30   | 58                 | ↑   |
| 7      | 423                  | P63260                    | Actin, cytoplasmic 2                                         | ACTG_MOUSE  | 0.007           | -2.93406           | 5.31            | 41766           | 38   | 57                 | ↓   |
| 8      | 1070                 | Q6DFW0                    | Guanine nucleotide exchange factor C9orf72 homolog           | CI072_MOUSE | 0.007           | 18.47058           | 5.4             | 47284           | 132  | 57                 | ↑   |
| 9      | 756                  | Q3TDX8                    | Cytochrome b5 reductase 4                                    | NB5R4_MOUSE | 0.008           | 2.964571           | 6.3             | 60543           | 94   | 80                 | ↑   |
| 10     | 368                  | P20152                    | Vimentin                                                     | VIME_MOUSE  | 0.009           | -7.76575           | 5.06            | 53655           | 70   | 347                | ↓   |
| 11     | 411                  | P38647                    | Stress-70 protein, mitochondrial                             | GRP75_MOUSE | 0.01            | -2.82905           | 5.91            | 73483           | 44   | 179                | ↓   |
| 12     | 895                  | Q99L13                    | 3-hydroxyisobutyrate dehydrogenase, mitochondrial            | 3HIDH_MOUSE | 0.01            | -2.50973           | 8.37            | 35417           | 32   | 58                 | ↓   |
| 13     | 371                  | Q6P1G2                    | Lysine-specific demethylase 2B                               | KDM2B_MOUSE | 0.01            | -5.04869           | 8.66            | 149638          | 15   | 57                 | ↓   |
| 14     | 1132                 | P07091                    | Protein S100-A4                                              | S10A4_MOUSE | 0.012           | -3.89148           | 5.23            | 11714           | 43   | 70                 | ↓   |
| 15     | 961                  | P67778                    | Prohibitin 1                                                 | PHB_MOUSE   | 0.013           | -1.98007           | 5.57            | 29802           | 63   | 99                 | ↓   |
| 16     | 143                  | Q02566                    | Myosin-6                                                     | MYH6_MOUSE  | 0.013           | 4.335798           | 5.57            | 223426          | 36   | 57                 | ↑   |
| 17     | 362                  | Q99LD8                    | N(G),N(G)-dimethylarginine dimethylaminohydrolase 2          | DDAH2_MOUSE | 0.014           | -5.1482            | 5.66            | 29627           | 13   | 57                 | ↓   |
| 18     | 428                  | Q91VD9                    | NADH-ubiquinone oxidoreductase 75 kDa subunit, mitochondrial | NDUS1_MOUSE | 0.018           | -2.0888            | 5.51            | 79698           | 34   | 67                 | ↓   |
| 19     | 727                  | P56480                    | ATP synthase subunit beta, mitochondrial                     | ATPB_MOUSE  | 0.019           | -1.81516           | 5.19            | 56265           | 63   | 165                | ↓   |
| 20     | 759                  | Q6P1Y8                    | Type II inositol 3,4-bisphosphate 4-phosphatase              | INP4B_MOUSE | 0.02            | -2.4315            | 5.69            | 100465          | 20   | 57                 | ↓   |
| 21     | 369                  | Q05920                    | Pyruvate carboxylase, mitochondrial                          | PYC_MOUSE   | 0.021           | -4.49871           | 6.25            | 129602          | 29   | 151                | ↓   |
| 22     | 373                  | Q6P1Y8                    | Type II inositol 3,4-bisphosphate 4-phosphatase              | INP4B_MOUSE | 0.023           | -3.874             | 5.69            | 100465          | 15   | 57                 | ↓   |
| 23     | 1139                 | Q05920                    | Pyruvate carboxylase, mitochondrial                          | PYC_MOUSE   | 0.026           | -3.76159           | 6.25            | 129602          | 22   | 117                | ↓   |
| 24     | 365                  | Q8BY02                    | NF-kappa-B-repressing factor                                 | NKRF_MOUSE  | 0.027           | -5.21235           | 9.08            | 77658           | 17   | 57                 | ↓   |
| 25     | 367                  | Q9JL25                    | Regulator of G-protein signaling 1                           | RGS1_MOUSE  | 0.03            | -3.67879           | 9.2             | 24091           | 41   | 68                 | ↓   |
| 26     | 414                  | Q8BHX1                    | HAUS augmin-like complex subunit 1                           | HAUS1_MOUSE | 0.03            | -3.92161           | 5.56            | 31359           | 30   | 62                 | ↓   |
| 27     | 549                  | Q99LD8                    | N(G),N(G)-dimethylarginine dimethylaminohydrolase 2          | DDAH2_MOUSE | 0.037           | 1.832763           | 5.66            | 29627           | 13   | 57                 | ↑   |
| 28     | 741                  | P14211                    | Calreticulin                                                 | CALR_MOUSE  | 0.039           | -2.17188           | 4.33            | 47965           | 27   | 85                 | ↓   |
| 29     | 765                  | Q922R8                    | Protein disulfide-isomerase A6                               | PDIA6_MOUSE | 0.039           | -1.8828            | 5               | 48070           | 34   | 94                 | ↓   |
| 30     | 422                  | P20152                    | Vimentin                                                     | VIME_MOUSE  | 0.04            | -2.07737           | 5.06            | 53655           | 48   | 172                | ↓   |
| 31     | 1108                 | P16045                    | Galectin-1                                                   | LEG1_MOUSE  | 0.044           | -2.03928           | 5.32            | 14856           | 42   | 59                 | ↓   |
| 32     | 803                  | P63260                    | Actin, cytoplasmic 2                                         | ACTG_MOUSE  | 0.047           | -2.45903           | 5.31            | 41766           | 60   | 127                | ↓   |
| 33     | 136                  | Q32MG2                    | Protein chibby homolog 2                                     | SPERT_MOUSE | 0.048           | 3.585876           | 6.28            | 51833           | 21   | 57                 | ↑   |

|    |      |        |                                                                                |             |       |          |      |        |    |    |   |
|----|------|--------|--------------------------------------------------------------------------------|-------------|-------|----------|------|--------|----|----|---|
| 34 | 556  | P35486 | Pyruvate dehydrogenase E1 component subunit alpha, somatic form, mitochondrial | ODPA_MOUSE  | 0.049 | 3.408055 | 8.49 | 43204  | 27 | 57 | ↑ |
| 35 | 861  | P14206 | 40S ribosomal protein SA                                                       | RSSA_MOUSE  | 0.05  | 7.282463 | 4.8  | 32817  | 49 | 74 | ↑ |
| 36 | 985  | B2RVL6 | Zinc finger CCHC domain-containing protein 24                                  | ZCH24_MOUSE | 0.051 | -1.8505  | 8.98 | 26943  | 33 | 57 | ↓ |
| 37 | 1077 | Q6P1Y8 | Type II inositol 3,4-bisphosphate 4-phosphatase                                | INP4B_MOUSE | 0.058 | -4.71116 | 5.69 | 104465 | 15 | 57 | ↓ |

**Supplementary Table S4: Differentially abundant proteins between RBMS1 Knockdown vs. Scramble Control . MALDI-TOF mass spectrometry was utilized to identify and analyze the protein spots from the 2D-DIGE gels**

<sup>a</sup>Spot numbers matched those included in the 2D-image

<sup>b</sup>Protein accession number for SWISSPROT Database

<sup>c</sup>Protein expression between RBMS1 knockdown vs scramble control ( positive values demonstrate an increase in the protein abundance in RBMS1 knockdown; negative values demonstrate a decrease in the protein abundance in RBMS1 knockdown)

<sup>d</sup>Theoretical isoelectric point

<sup>e</sup>Theoretical molecular weight

<sup>f</sup>MASCOT score

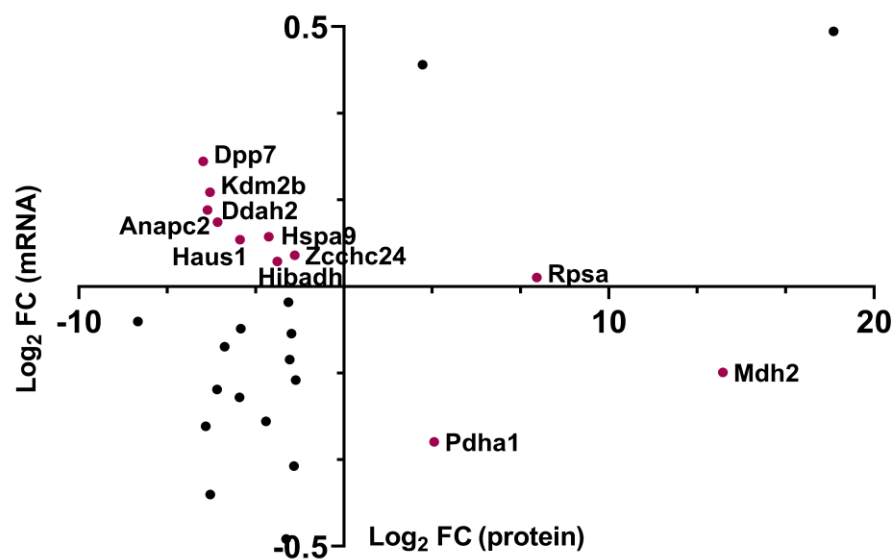

**Supplemental Figure S3 (S3).** Comparative analysis of these proteins and their mRNA expression (y-axis for log2-fold change in mRNA abundance and x-axis for log2-fold change in protein abundance). Each dot represents a protein/gene and red dots indicate those proteins whose mRNA expression is unchanged or does not align with changes in the protein expression.



| Serial | Antibody name      | Host/Isotype | Type               | Reference                         |
|--------|--------------------|--------------|--------------------|-----------------------------------|
| 1      | $\beta$ -Actin     | Mouse/ IgG2b | Primary Antibody   | Invitrogen (MA5-15739)            |
| 2      | $\alpha$ - Tubulin | Mouse/ IgG1  | Primary Antibody   | Invitrogen (A11126)               |
| 3      | GAPDH              | Mouse / IgG1 | Primary Antibody   | Invitrogen ( <b>MA5-15738</b> )   |
| 4      | PPAR $\gamma$      | Rabbit/ IgG  | Primary Antibody   | Invitrogen (PA3-821A)             |
| 5      | C/EBP $\alpha$     | Rabbit/ IgG  | Primary Antibody   | Cell Signaling Technology (8178S) |
| 6      | ATGL               | Rabbit/ IgG  | Primary Antibody   | Cell Signaling Technology (2439S) |
| 7      | Adiponectin        | Mouse / IgG  | Primary Antibody   | Invitrogen (MA1-054)              |
| 8      | HSL                | Rabbit/ IgG  | Primary Antibody   | Cell Signaling Technology (4107S) |
| 9      | Goat Anti-mouse    | Goat / IgG   | Secondary antibody | Invitrogen (31430)                |
| 10     | Goat Anti-Rabbit   | Goat / IgG   | Secondary antibody | Invitrogen (31460)                |
| 11     | RBMS1              | Rabbit/ IgG  | Primary Antibody   | Abcam(ab150353)                   |

Supplementary Table S5. The list of primary and secondary antibodies used in this study.

| Gene Name       | Forward (5'-3')          | Reverse (5'-3')        |
|-----------------|--------------------------|------------------------|
| Actin           | ATGACCCAAGCCGAGAAGG      | CGGCCAAGTCTTAGAGTTGTTG |
| Hsl             | GGCAGTGGTGTGTAAGTAGGATTG | ATCCATGCTGTGTGAGAACGC  |
| Adipocnectin    | AACTTGTGCAGGTTGGATGG     | CGATACACATAAGCGGCTT    |
| Atgl            | GGAACCAAAGGACCTGATGACC   | ACATCAGGCAGCCACTCCAACA |
| Ppar $\gamma$ 2 | GCATGGTGCCTTCGCTGA       | TGGCATCTCTGTGTCAACCATG |
| C/ebp $\alpha$  | CAAGAACAGCAACGAGTACCG    | GTCATGGTCAACTCCAGCAC   |
| RBMS1           | CTGAGCAAGACAAACCTCTACAT  | GGCCTTATCCAAAATCGCCTT  |

Supplemental table S6. Sequences of the forward and reverse primers for mouse species ordered from Macrogen and used in the quantitative real time PCR (qRT-PCR).
